# Supplementary material for: Molecular Characterization, Gene Evolution, and Expression Analysis of the Fructose-1, 6-bisphosphate Aldolase (FBA) Gene Family in Wheat (Triticum aestivum L.)
Source: Front Plant Sci. 2017 Jun 14;8:1030. doi: 10.3389/fpls.2017.01030 (PMC5470051; doi:10.3389/fpls.2017.01030)
Supplement: Table S5 — HMM search hits of FBA proteins. [file Table5.XLSX]

## Sheet: Sheet1
Table S5. HMM search hits of FBA proteins.
Gene	Hits	Species	Group	AA	TIM barrel
					from	to
AERPE_Q9YG90	Q9YG90	Aeropyrum pernix	Archaea-TACK group	272	22	244
CENSY_A0RV30	A0RV30	Cenarchaeum symbiosum	Archaea-TACK group	505	131	487
HALS3_B0R3Y0	B0R3Y0	Halobacterium salinarum	Archaea-Euryarchaeota	263	15	236
HALSA_Q9HRI2	Q9HRI2	Halobacterium salinarum	Archaea-Euryarchaeota	263	15	236
HALVD_D4GYE0	D4GYE0	Haloferax volcanii	Archaea-Euryarchaeota	330	7	326
IGNH4_A8A9E4	A8A9E4	Ignicoccus hospitalis	Archaea-TACK group	387	4	363
METJA_Q57747	Q57747	Methanocaldococcus jannaschii	Archaea-Euryarchaeota	389	8	367
METJA_Q57843	Q57843	Methanocaldococcus jannaschii	Archaea-Euryarchaeota	273	27	243
METJA_Q58980	Q58980	Methanocaldococcus jannaschii	Archaea-Euryarchaeota	310	42	276
METS5_A4YIZ5	A4YIZ5	Metallosphaera sedula	Archaea-TACK group	383	2	362
METTM_D9PUH5	D9PUH5	Methanothermobacter marburgensis	Archaea-Euryarchaeota	365	2	362
PYRAB_Q9V2I6	Q9V2I6	Pyrococcus abyssi	Archaea-Euryarchaeota	281	23	251
PYRFU_P58314	P58314	Pyrococcus furiosus	Archaea-Euryarchaeota	281	23	251
PYRHO_O57840	O57840	Pyrococcus horikoshii	Archaea-Euryarchaeota	281	23	251
PYRNV_B1YAL1	B1YAL1	Pyrobaculum neutrophilum	Archaea-TACK group	399	2	371
SULTO_F9VMT6	F9VMT6	Sulfolobus tokodaii	Archaea-TACK group	384	2	362
THEKO_Q8J308	Q8J308	Thermococcus kodakarensis	Archaea-Euryarchaeota	281	23	251
THEKO_Q8NKR9	Q8NKR9	Thermococcus kodakarensis	Archaea-Euryarchaeota	375	6	372
THETK_P58315	P58315	Thermoproteus tenax	Archaea-TACK group	263	18	237
BACHD_Q9KAH3	Q9KAH3	Bacillus halodurans	Bacteria-Terrabacteria group	288	4	283
BACLD_Q65D09	Q65D09	Bacillus licheniformis	Bacteria-Terrabacteria group	292	4	283
BACSK_Q5WKY5	Q5WKY5	Bacillus clausii	Bacteria-Terrabacteria group	293	4	283
BACSU_P13243	P13243	Bacillus subtilis	Bacteria-Terrabacteria group	285	4	284
BACSU_P42420	P42420	Bacillus subtilis	Bacteria-Terrabacteria group	290	4	283
BACVZ_A7ZAH2	A7ZAH2	Bacillus velezensis	Bacteria-Terrabacteria group	290	4	283
BORBU_O51401	O51401	Borrelia burgdorferi	Bacteria-Spirochaetales	359	15	358
BUCAI_P57526	P57526	Buchnera aphidicola	Bacteria-Proteobacteria	358	15	356
BUCAP_Q8K9B2	Q8K9B2	Buchnera aphidicola	Bacteria-Proteobacteria	359	15	357
BUCBP_Q89AB6	Q89AB6	Buchnera aphidicola	Bacteria-Proteobacteria	359	16	358
CAMJE_Q0PAS0	Q0PAS0	Campylobacter jejuni	Bacteria-Proteobacteria	354	15	353
CAMJJ_A1VYV7	A1VYV7	Campylobacter jejuni	Bacteria-Proteobacteria	354	15	353
CHLMU_Q9PKH8	Q9PKH8	Chlamydia muridarum	Bacteria-Chlamydia	349	67	325
CHLPN_Q9Z8Q7	Q9Z8Q7	Chlamydia pneumoniae	Bacteria-Chlamydia	349	68	325
CHLTR_O84217	O84217	Chlamydia trachomatis	Bacteria-Chlamydia	348	67	324
CLOAB_Q97TN4	Q97TN4	Clostridium acetobutylicum	Bacteria-Terrabacteria group	295	1	213
CLOB8_A6LXU8	A6LXU8	Clostridium beijerinckii	Bacteria-Terrabacteria group	295	2	218
CORGL_P19537	P19537	Corynebacterium glutamicum	Bacteria-Terrabacteria group	344	7	340
CUPNH_Q59100	Q59100	Cupriavidus necator	Bacteria-Proteobacteria	345	4	328
CUPNH_Q59101	Q59101	Cupriavidus necator	Bacteria-Proteobacteria	345	4	328
ECO57_P0AB72	P0AB72	Escherichia coli	Bacteria-Proteobacteria	359	16	357
ECOL6_P0A992	P0A992	Escherichia coli	Bacteria-Proteobacteria	350	68	326
ECOLI_P0A991	P0A991	Escherichia coli	Bacteria-Proteobacteria	350	68	326
ECOLI_P0AB71	P0AB71	Escherichia coli	Bacteria-Proteobacteria	359	16	357
ECOLI_P0AB74	P0AB74	Escherichia coli	Bacteria-Proteobacteria	286	4	283
EDWI9_O52402	O52402	Edwardsiella ictaluri	Bacteria-Proteobacteria	358	16	356
FUSNN_Q8RGH3	Q8RGH3	Fusobacterium nucleatum	Bacteria-Chlamydia	295	4	224
GEOSE_P94453	P94453	Geobacillus stearothermophilus	Bacteria-Terrabacteria group	287	4	284
HAEIN_P44429	P44429	Haemophilus influenzae	Bacteria-Proteobacteria	359	16	357
HELPJ_Q9ZMQ6	Q9ZMQ6	Helicobacter pylori	Bacteria-Proteobacteria	307	3	306
HELPY_P56109	P56109	Helicobacter pylori	Bacteria-Proteobacteria	307	3	306
MOOTA_Q2RG86	Q2RG86	Moorella thermoacetica	Bacteria-Terrabacteria group	379	4	361
MYCBO_P67476	P67476	Mycobacterium bovis	Bacteria-Terrabacteria group	344	7	340
MYCGE_P47269	P47269	Mycoplasma genitalium	Bacteria-Terrabacteria group	288	3	287
MYCLE_O69600	O69600	Mycobacterium leprae	Bacteria-Terrabacteria group	345	7	340
MYCPN_P75089	P75089	Mycoplasma pneumoniae	Bacteria-Terrabacteria group	288	3	287
MYCTO_P9WQA2	P9WQA2	Mycobacterium tuberculosis	Bacteria-Terrabacteria group	344	7	340
MYCTU_P9WQA3	P9WQA3	Mycobacterium tuberculosis	Bacteria-Terrabacteria group	344	7	340
NOSCO_Q9XDP3	Q9XDP3	Nostoc commune	Bacteria-Terrabacteria group	359	4	328
NOSS1_Q8YNK2	Q8YNK2	Nostoc sp.	Bacteria-Terrabacteria group	359	4	328
OCEIH_Q8ELI2	Q8ELI2	Oceanobacillus iheyensis	Bacteria-Terrabacteria group	294	3	225
PORG3_B2RLG9	B2RLG9	Porphyromonas gingivalis	Bacteria-Porphyromonas gingivalis	293	9	213
PORGI_P60053	P60053	Porphyromonas gingivalis	Bacteria-Porphyromonas gingivalis	293	9	213
PSEAE_Q9I5Y1	Q9I5Y1	Pseudomonas aeruginosa	Bacteria-Proteobacteria	354	4	328
PSEST_O87796	O87796	Pseudomonas stutzeri	Bacteria-Proteobacteria	354	4	328
RHIME_P58336	P58336	Rhizobium meliloti	Bacteria-Proteobacteria	359	4	328
RHOSH_P27995	P27995	Rhodobacter sphaeroides	Bacteria-Proteobacteria	359	4	328
RHOSH_P29271	P29271	Rhodobacter sphaeroides	Bacteria-Proteobacteria	354	4	328
SHIFL_P0AB73	P0AB73	Shigella flexneri	Bacteria-Proteobacteria	359	16	357
SINMW_P56888	P56888	Sinorhizobium medicae	Bacteria-Proteobacteria	359	4	328
STAA1_A7X6Y6	A7X6Y6	Staphylococcus aureus	Bacteria-Terrabacteria group	296	4	224
STAA2_A6U4Y6	A6U4Y6	Staphylococcus aureus	Bacteria-Terrabacteria group	296	4	224
STAA3_Q2FDQ4	Q2FDQ4	Staphylococcus aureus	Bacteria-Terrabacteria group	296	4	229
STAA8_Q2FV17	Q2FV17	Staphylococcus aureus	Bacteria-Terrabacteria group	296	4	229
STAA9_A5IW31	A5IW31	Staphylococcus aureus	Bacteria-Terrabacteria group	296	4	224
STAAB_Q2YWF3	Q2YWF3	Staphylococcus aureus	Bacteria-Terrabacteria group	296	4	221
STAAC_Q5HCU6	Q5HCU6	Staphylococcus aureus	Bacteria-Terrabacteria group	296	4	229
STAAC_Q5HE75	Q5HE75	Staphylococcus aureus	Bacteria-Terrabacteria group	286	4	284
STAAE_A6QK93	A6QK93	Staphylococcus aureus	Bacteria-Terrabacteria group	296	4	229
STAAM_P67472	P67472	Staphylococcus aureus	Bacteria-Terrabacteria group	296	4	224
STAAM_P67477	P67477	Staphylococcus aureus	Bacteria-Terrabacteria group	286	4	284
STAAN_P99075	P99075	Staphylococcus aureus	Bacteria-Terrabacteria group	286	4	284
STAAN_P99117	P99117	Staphylococcus aureus	Bacteria-Terrabacteria group	296	4	224
STAAR_Q6GDJ7	Q6GDJ7	Staphylococcus aureus	Bacteria-Terrabacteria group	296	4	221
STAAR_Q6GEV0	Q6GEV0	Staphylococcus aureus	Bacteria-Terrabacteria group	286	4	284
STAAS_Q6G670	Q6G670	Staphylococcus aureus	Bacteria-Terrabacteria group	296	4	227
STAAS_Q6G7I5	Q6G7I5	Staphylococcus aureus	Bacteria-Terrabacteria group	286	4	284
STAAT_A8Z3K5	A8Z3K5	Staphylococcus aureus	Bacteria-Terrabacteria group	296	4	229
STAAW_P67478	P67478	Staphylococcus aureus	Bacteria-Terrabacteria group	286	4	284
STAAW_Q8NUM5	Q8NUM5	Staphylococcus aureus	Bacteria-Terrabacteria group	296	4	227
STACT_Q07159	Q07159	Staphylococcus carnosus	Bacteria-Terrabacteria group	296	5	224
STAEQ_Q5HL21	Q5HL21	Staphylococcus epidermidis	Bacteria-Terrabacteria group	296	3	221
STAEQ_Q5HM97	Q5HM97	Staphylococcus epidermidis	Bacteria-Terrabacteria group	286	4	284
STAES_Q8CMY5	Q8CMY5	Staphylococcus epidermidis	Bacteria-Terrabacteria group	296	3	221
STAES_Q8CNI3	Q8CNI3	Staphylococcus epidermidis	Bacteria-Terrabacteria group	286	4	284
STAHJ_Q4L9B6	Q4L9B6	Staphylococcus haemolyticus	Bacteria-Terrabacteria group	296	3	224
STRCO_Q9X8R6	Q9X8R6	Streptomyces coelicolor	Bacteria-Terrabacteria group	343	7	340
STRGB_Q9ZEM7	Q9ZEM7	Streptomyces galbus	Bacteria-Terrabacteria group	340	7	337
STRP1_P68905	P68905	Streptococcus pyogenes	Bacteria-Terrabacteria group	293	4	292
STRP3_P0CZ58	P0CZ58	Streptococcus pyogenes	Bacteria-Terrabacteria group	293	4	292
STRP6_Q5XA12	Q5XA12	Streptococcus pyogenes	Bacteria-Terrabacteria group	293	4	292
STRP8_P68906	P68906	Streptococcus pyogenes	Bacteria-Terrabacteria group	293	4	292
STRPN_P0A4S1	P0A4S1	Streptococcus pneumoniae	Bacteria-Terrabacteria group	293	4	292
STRPQ_P0CZ59	P0CZ59	Streptococcus pyogenes	Bacteria-Terrabacteria group	293	4	292
STRR6_P0A4S2	P0A4S2	Streptococcus pneumoniae	Bacteria-Terrabacteria group	293	4	292
SYNY3_P74309	P74309	Synechocystis	Bacteria-Terrabacteria group	300	11	229
SYNY3_Q55664	Q55664	Synechocystis sp.	Bacteria-Terrabacteria group	359	4	328
THECA_Q703I2	Q703I2	Thermus caldophilus	Bacteria-Terrabacteria group	305	3	304
THET2_Q72K02	Q72K02	Thermus thermophilus	Bacteria-Terrabacteria group	363	2	363
TREDE_Q73QV3	Q73QV3	Treponema denticola	Bacteria-Spirochaetales	295	5	216
TREPA_O83668	O83668	Treponema pallidum	Bacteria-Spirochaetales	332	10	331
UREPA_Q9PPP3	Q9PPP3	Ureaplasma parvum	Bacteria-Terrabacteria group	290	5	288
XANAC_Q8PHB5	Q8PHB5	Xanthomonas axonopodis	Bacteria-Proteobacteria	334	5	334
XANCP_Q8P5Z7	Q8P5Z7	Xanthomonas campestris	Bacteria-Proteobacteria	334	5	334
XANFL_Q56815	Q56815	Xanthobacter flavus	Bacteria-Proteobacteria	354	4	328
XYLFA_Q9PF52	Q9PF52	Xylella fastidiosa	Bacteria-Proteobacteria	334	5	334
XYLFT_Q87AI0	Q87AI0	Xylella fastidiosa	Bacteria-Proteobacteria	334	5	334
ASPOR_Q9HGY9	Q9HGY9	Aspergillus oryzae	Eukaryota-Fungi	362	19	361
BOVIN_Q3T0S5	Q3T0S5	Bos taurus	Eukaryota-Bilateria	364	15	364
CAEEL_P46563	P46563	Caenorhabditis elegans	Eukaryota-Bilateria	366	19	366
CAEEL_P54216	P54216	Caenorhabditis elegans	Eukaryota-Bilateria	366	15	366
CANAL_Q9URB4	Q9URB4	Candida albicans	Eukaryota-Fungi	359	16	358
CARAU_P53448	P53448	Carassius auratus	Eukaryota-Bilateria	363	15	363
CHICK_P07341	P07341	Gallus gallus	Eukaryota-Bilateria	364	15	364
CHLRE_Q42690	Q42690	Chlamydomonas reinhardtii	Eukaryota-Viridiplantae	377	33	377
CICAR_O65735	O65735	Cicer arietinum	Eukaryota-Viridiplantae	359	11	359
COCIM_P0CJ44	P0CJ44	Coccidioides immitis	Eukaryota-Fungi	302	9	294
DANRE_Q4KMC8	Q4KMC8	Danio rerio	Eukaryota-Bilateria	364	15	364
DANRE_Q8JH70	Q8JH70	Danio rerio	Eukaryota-Bilateria	363	15	363
DANRE_Q8JH71	Q8JH71	Danio rerio	Eukaryota-Bilateria	364	15	364
DICDI_Q86A67	Q86A67	Dictyostelium discoideum	Eukaryota-Dictyostelium discoideum	357	8	357
DROME_P07764	P07764	Drosophila melanogaster	Eukaryota-Bilateria	361	15	361
ECHMU_Q9GP32	Q9GP32	Echinococcus multilocularis	Eukaryota-Bilateria	363	15	363
ENCCU_Q8SSM8	Q8SSM8	Encephalitozoon cuniculi	Eukaryota-Fungi	338	9	338
HUMAN_P04075	P04075	Homo sapiens	Eukaryota-Bilateria	364	15	364
HUMAN_P05062	P05062	Homo sapiens	Eukaryota-Bilateria	364	15	364
HUMAN_P09972	P09972	Homo sapiens	Eukaryota-Bilateria	364	15	364
KLULA_Q9C2U0	Q9C2U0	Kluyveromyces lactis	Eukaryota-Fungi	361	17	359
LETCA_P53445	P53445	Lethenteron camtschaticum	Eukaryota-Bilateria	363	15	363
LETCA_P53446	P53446	Lethenteron camtschaticum	Eukaryota-Bilateria	364	15	364
MACFA_Q9GKW3	Q9GKW3	Macaca fascicularis	Eukaryota-Bilateria	364	15	364
MAIZE_P08440	P08440	Zea mays	Eukaryota-Viridiplantae	355	11	355
MOUSE_P05063	P05063	Mus musculus	Eukaryota-Bilateria	363	15	363
MOUSE_P05064	P05064	Mus musculus	Eukaryota-Bilateria	364	15	364
MOUSE_Q91Y97	Q91Y97	Mus musculus	Eukaryota-Bilateria	364	15	364
NEUCR_P53444	P53444	Neurospora crassa	Eukaryota-Fungi	362	17	361
ORYSJ_P17784	P17784	Oryza sativa	Eukaryota-Viridiplantae	358	11	358
ORYSJ_Q10A30	Q10A30	Oryza sativa	Eukaryota-Viridiplantae	358	11	358
ORYSJ_Q40677	Q40677	Oryza sativa	Eukaryota-Viridiplantae	388	44	388
ORYSJ_Q5N725	Q5N725	Oryza sativa	Eukaryota-Viridiplantae	358	11	358
PANTR_A5A6I5	A5A6I5	Pan troglodytes	Eukaryota-Bilateria	364	15	364
PANTR_Q5R1X4	Q5R1X4	Pan troglodytes	Eukaryota-Bilateria	364	15	364
PARBA_Q8J0N6	Q8J0N6	Paracoccidioides lutzii	Eukaryota-Fungi	363	17	356
PARBA_Q96UH7	Q96UH7	Paracoccidioides lutzii	Eukaryota-Fungi	360	17	359
PEA_P46256	P46256	Pisum sativum	Eukaryota-Viridiplantae	357	11	357
PEA_P46257	P46257	Pisum sativum	Eukaryota-Viridiplantae	359	11	359
PEA_Q01516	Q01516	Pisum sativum	Eukaryota-Viridiplantae	356	12	356
PEA_Q01517	Q01517	Pisum sativum	Eukaryota-Viridiplantae	349	6	349
PLABA_P49577	P49577	Plasmodium berghei	Eukaryota-Plasmodium	358	10	358
PLAF7_Q7KQL9	Q7KQL9	Plasmodium falciparum	Eukaryota-Plasmodium	369	21	369
PLAFA_P14223	P14223	Plasmodium falciparum	Eukaryota-Plasmodium	369	21	369
PONAB_Q5NVR5	Q5NVR5	Pongo abelii	Eukaryota-Bilateria	364	15	364
PONAB_Q5RFA6	Q5RFA6	Pongo abelii	Eukaryota-Bilateria	364	15	364
RABIT_P00883	P00883	Oryctolagus cuniculus	Eukaryota-Bilateria	364	15	364
RABIT_P79226	P79226	Oryctolagus cuniculus	Eukaryota-Bilateria	364	15	364
RAT_P00884	P00884	Rattus norvegicus	Eukaryota-Bilateria	364	15	364
RAT_P05065	P05065	Rattus norvegicus	Eukaryota-Bilateria	364	15	364
RAT_P09117	P09117	Rattus norvegicus	Eukaryota-Bilateria	363	15	363
SALSA_B5DGM7	B5DGM7	Salmo salar	Eukaryota-Bilateria	363	15	363
SCHMA_P53442	P53442	Schistosoma mansoni	Eukaryota-Bilateria	363	15	363
SCHPO_P36580	P36580	Schizosaccharomyces pombe	Eukaryota-Fungi	358	15	357
SHEEP_P52210	P52210	Ovis aries	Eukaryota-Bilateria	364	15	364
SPAAU_P53447	P53447	Sparus aurata	Eukaryota-Bilateria	364	15	364
SPIOL_P16096	P16096	Spinacia oleracea	Eukaryota-Viridiplantae	394	52	393
SPIOL_P29356	P29356	Spinacia oleracea	Eukaryota-Viridiplantae	357	11	357
TRYBB_P07752	P07752	Trypanosoma brucei	Eukaryota-Plasmodium	372	25	372
YEAST_P14540	P14540	Saccharomyces cerevisiae	Eukaryota-Fungi	359	17	358
AT1G18270	AT1G18270	Arabidopsis thaliana	Eukaryota-Viridiplantae	1393	1116	1392
AtFBA1	AT2G21330	Arabidopsis thaliana	Eukaryota-Viridiplantae	311	55	311
AtFBA2	At4G38970	Arabidopsis thaliana	Eukaryota-Viridiplantae	381	54	314
AtFBA3	AT2G01140	Arabidopsis thaliana	Eukaryota-Viridiplantae	391	47	391
AtFBA4	AT5G03690	Arabidopsis thaliana	Eukaryota-Viridiplantae	393	45	393
AtFBA5	AT4G26530	Arabidopsis thaliana	Eukaryota-Viridiplantae	358	11	358
AtFBA6	AT2G36460	Arabidopsis thaliana	Eukaryota-Viridiplantae	358	11	358
AtFBA7	AT4G26520	Arabidopsis thaliana	Eukaryota-Viridiplantae	358	11	358
AtFBA8	AT3G52930	Arabidopsis thaliana	Eukaryota-Viridiplantae	358	11	358
BRADI1G44060	BRADI1G44060	Brachypodium distachyon	Eukaryota-Viridiplantae	1383	1106	1382
BRADI2G01350	BRADI2G01350	Brachypodium distachyon	Eukaryota-Viridiplantae	387	43	387
BRADI2G58050	BRADI2G58050	Brachypodium distachyon	Eukaryota-Viridiplantae	358	11	358
BRADI4G24367	BRADI4G24367	Brachypodium distachyon	Eukaryota-Viridiplantae	388	44	388
F775_26377	F775_26377	Aegilops tauschii	Eukaryota-Viridiplantae	358	11	358
F775_27796	F775_27796	Aegilops tauschii	Eukaryota-Viridiplantae	358	11	358
F775_28855	F775_28855	Aegilops tauschii	Eukaryota-Viridiplantae	412	70	412
F775_29158	F775_29158	Aegilops tauschii	Eukaryota-Viridiplantae	1310	1033	1309
F775_32412	F775_32412	Aegilops tauschii	Eukaryota-Viridiplantae	388	44	388
F775_32635	F775_32635	Aegilops tauschii	Eukaryota-Viridiplantae	358	11	358
LPERR01G01150	LPERR01G01150	Leersia perrieri	Eukaryota-Viridiplantae	392	48	392
LPERR01G35590	LPERR01G35590	Leersia perrieri	Eukaryota-Viridiplantae	358	11	358
LPERR05G12550	LPERR05G12550	Leersia perrieri	Eukaryota-Viridiplantae	358	11	358
LPERR06G08880	LPERR06G08880	Leersia perrieri	Eukaryota-Viridiplantae	1394	1116	1393
LPERR11G03860	LPERR11G03860	Leersia perrieri	Eukaryota-Viridiplantae	388	44	388
MLOC_14013	MLOC_14013	Hordeum vulgare	Eukaryota-Viridiplantae	358	11	358
MLOC_52040	MLOC_52040	Hordeum vulgare	Eukaryota-Viridiplantae	388	44	388
MLOC_58958	MLOC_58958	Hordeum vulgare	Eukaryota-Viridiplantae	385	41	385
MLOC_73299	MLOC_73299	Hordeum vulgare	Eukaryota-Viridiplantae	358	11	358
OS01G0118000	OS01G0118000	Oryza sativa	Eukaryota-Viridiplantae	388	44	388
OS06G0258900	OS06G0258900	Oryza sativa	Eukaryota-Viridiplantae	1376	1099	1375
OS10G0163340	OS10G0163340	Oryza sativa	Eukaryota-Viridiplantae	358	11	358
OS11G0171300	OS11G0171300	Oryza sativa	Eukaryota-Viridiplantae	388	44	388
Sb03g008050	Sb03g008050	Sorghum bicolor	Eukaryota-Viridiplantae	387	43	387
Sb03g043140	Sb03g043140	Sorghum bicolor	Eukaryota-Viridiplantae	355	11	355
Sb04g019020	Sb04g019020	Sorghum bicolor	Eukaryota-Viridiplantae	358	11	358
Sb05g004590	Sb05g004590	Sorghum bicolor	Eukaryota-Viridiplantae	388	44	388
Sb08g004500	Sb08g004500	Sorghum bicolor	Eukaryota-Viridiplantae	389	45	389
Sb10g009360	Sb10g009360	Sorghum bicolor	Eukaryota-Viridiplantae	1379	1102	1378
Si001803m.g	Si001803m.g	Setaria italica	Eukaryota-Viridiplantae	387	43	387
Si005728m.g	Si005728m.g	Setaria italica	Eukaryota-Viridiplantae	1142	1042	1137
Si010312m.g	Si010312m.g	Setaria italica	Eukaryota-Viridiplantae	388	44	388
Si017614m.g	Si017614m.g	Setaria italica	Eukaryota-Viridiplantae	358	11	358
Si026480m.g	Si026480m.g	Setaria italica	Eukaryota-Viridiplantae	389	45	389
TaFBA1_AA0674090	TRIAE_CS42_3AS_TGACv1_210508_AA0674090.1	Triticum aestivum	Eukaryota-Viridiplantae	387	43	387
TaFBA2_AA0736640	TRIAE_CS42_3B_TGACv1_221301_AA0736640.1	Triticum aestivum	Eukaryota-Viridiplantae	419	75	419
TaFBA3_AA0929470	TRIAE_CS42_3DS_TGACv1_273209_AA0929470.1	Triticum aestivum	Eukaryota-Viridiplantae	387	43	387
TaFBA4_AA0975400	TRIAE_CS42_4AL_TGACv1_289694_AA0975400.1	Triticum aestivum	Eukaryota-Viridiplantae	388	44	388
TaFBA5_AA1084770	TRIAE_CS42_4BS_TGACv1_328216_AA1084770.1	Triticum aestivum	Eukaryota-Viridiplantae	388	44	388
TaFBA6_AA1171030	TRIAE_CS42_4DS_TGACv1_361640_AA1171030.1	Triticum aestivum	Eukaryota-Viridiplantae	388	44	388
TaFBA7_AA1259600	TRIAE_CS42_5AS_TGACv1_392499_AA1259600.1	Triticum aestivum	Eukaryota-Viridiplantae	363	41	330
TaFBA8_AA1375670	TRIAE_CS42_5BS_TGACv1_423387_AA1375670.1	Triticum aestivum	Eukaryota-Viridiplantae	385	41	385
TaFBA9_AA1478070	TRIAE_CS42_5DS_TGACv1_456793_AA1478070.1	Triticum aestivum	Eukaryota-Viridiplantae	385	41	385
TaFBA10_AA0660330	TRIAE_CS42_3AL_TGACv1_196429_AA0660330.1	Triticum aestivum	Eukaryota-Viridiplantae	358	11	358
TaFBA11_AA0655990	TRIAE_CS42_3AL_TGACv1_195966_AA0655990.1	Triticum aestivum	Eukaryota-Viridiplantae	358	11	358
TaFBA12_AA0745810	TRIAE_CS42_3B_TGACv1_221609_AA0745810.1	Triticum aestivum	Eukaryota-Viridiplantae	358	11	358
TaFBA13_AA0764590	TRIAE_CS42_3B_TGACv1_222439_AA0764590.1	Triticum aestivum	Eukaryota-Viridiplantae	358	11	358
TaFBA14_AA0884060	TRIAE_CS42_3DL_TGACv1_251713_AA0884060.1	Triticum aestivum	Eukaryota-Viridiplantae	358	11	358
TaFBA15_AA0868810	TRIAE_CS42_3DL_TGACv1_250475_AA0868810.1	Triticum aestivum	Eukaryota-Viridiplantae	358	11	358
TaFBA16_AA0888380	TRIAE_CS42_3DL_TGACv1_252211_AA0888380.1	Triticum aestivum	Eukaryota-Viridiplantae	347	11	347
TaFBA17_AA1278040	TRIAE_CS42_5AS_TGACv1_394081_AA1278040.1	Triticum aestivum	Eukaryota-Viridiplantae	244	1	47
TaFBA18_AA1382520	TRIAE_CS42_5BS_TGACv1_423736_AA1382520.1	Triticum aestivum	Eukaryota-Viridiplantae	519	144	448
TaFBA19_AA1845550	TRIAE_CS42_7AS_TGACv1_571185_AA1845550.1	Triticum aestivum	Eukaryota-Viridiplantae	1384	1106	1383
TaFBA20_AA1956500	TRIAE_CS42_7BS_TGACv1_594185_AA1956500.1	Triticum aestivum	Eukaryota-Viridiplantae	981	704	980
TaFBA21_AA2061770	TRIAE_CS42_7DS_TGACv1_624510_AA2061770.1	Triticum aestivum	Eukaryota-Viridiplantae	880	603	879
TRIUR3_07773	TRIUR3_07773	Triticum urartu	Eukaryota-Viridiplantae	1026	749	1025
TRIUR3_09015	TRIUR3_09015	Triticum urartu	Eukaryota-Viridiplantae	528	198	483
TRIUR3_13681	TRIUR3_13681	Triticum urartu	Eukaryota-Viridiplantae	388	44	388
TRIUR3_22960	TRIUR3_22960	Triticum urartu	Eukaryota-Viridiplantae	358	11	358
TRIUR3_24109	TRIUR3_24109	Triticum urartu	Eukaryota-Viridiplantae	358	11	358
					72	239
